# Supplementary material for: Impact of proprotein convertase subtilisin/kexin type 9 (PCSK9) inhibitors on intracranial atherosclerotic plaque characteristics and low density lipoprotein-cholesterol (LDL-C) reduction: a real-world observational study
Source: PeerJ. 2026 Jan 23;14:e20668. doi: 10.7717/peerj.20668 (PMC12834119; doi:10.7717/peerj.20668)
Supplement: Supplemental Information 1 [file peerj-14-20668-s001.xlsx]

## Sheet: xinixnixin
Group(0=standard treatment group,1=intensive treatment group)	Male sex(1=male,0=female)	Age(year)	Pre-enrollment mRS scores	NHISS scores at the time of onset	Location of stenosis: ICA	Location of stenosis: MCA	Stenosis degree: Moderate (50%-69%)	Stenosis degree: Severe (70%-99%)	好转	加重	Hypertension(0=No,1=Yes)	Diabetes(0=No,1=Yes)	Smoking(0=No,1=Yes)	Drinking(0=No,1=Yes)	Coronary artery disease(0=No,1=Yes)	Systolic blood pressure(mmHg)	Diastolic blood pressure(mmHg)	Total cholesterol(mmol/L)	Triglyceride(mmol/L)	LDL(mmol/L)	HDL(mmol/L)	HbA1c (%)	Average lumen area(mm2)	Plaque length(mm)	Plaque volume(mm3)	Remodeling index	Recurrent Ischemic cerebrovascular events（0=No,1=Yes）	Adverse events（0=No,1=Yes）	Total cholesterol-six months(mmol/L)	Total cholesterol change(mmol/L)	Total cholesterol percent change	Triglyceride-six months(mmol/L)	Triglycerid change(mmol/L)	Triglycerid percent change	LDL-six months(mmol/L)	LDL change(mmol/L)	LDL percent change	Up to standard（0=No,1=Yes）	HDL-six months(mmol/L)	HDL change(mmol/L)	HDL percent change	基线狭窄中度	基线狭窄重度	Stenosis degree-six months(0=inmrovement,1=aggravation)	Average lumen area(mm2)-six months	Average lumen area change(mm2)	Average lumen area percent change	Plaque length(mm)-six months	Plaque length change(mm)
0	0	63	0	2	0	1	0	1	0	0	1	0	0	0	0	169	100	5.64	1.48	3.81	1.22	5.7	3.35	14	118.26	0.7	0	0	6	-0.36	-0.0638298	1.33	0.15	0.101351	3.35	0.46	0.120735	0	1.28	-0.06	-0.0491803	0	1		2.18	1.17	0.349254	30	-16
0	0	43	0	1	0	1	0	1	0	0	1	0	0	0	0	152	87	4.88	2.75	3.23	0.95	5.6	2.08	8.4	51.94	0.76	1	0	3.57	1.31	0.268443	2.24	0.51	0.185455	1.57	1.66	0.513932	1	0.99	-0.04	-0.0421053	0	1		3.44	-1.36	-0.653846	21.7	-13.3
0	0	71	0	2	0	1	0	1	0	1	0	1	0	0	0	144	70	3.79	0.61	2.13	1.06	8.5	6.58	14	76.96	1.23	1	0	2.61	1.18	0.311346	0.65	-0.04	-0.0655738	1.1	1.03	0.483568	1	1.01	0.05	0.0471698	0	1	1	2.38	4.2	0.638298	117	-103
0	0	74	0	1	0	1	0	1	0	0	1	0	0	0	0	148	89	5.83	1.54	3.83	1.1	6	4.21	6	48.46	0.67	0	0	3.81	2.02	0.346484	1.33	0.21	0.136364	1.9	1.93	0.503916	0	1.31	-0.21	-0.190909	0	1		13.56	-9.35	-2.2209	30	-24
0	0	57	0	2	0	1	0	1	0	1	1	0	0	0	0	174	123	3.82	2.37	2.44	0.89	5.7	13.08	15	239.53	1.13	0	0	4.48	-0.66	-0.172775	1.09	1.28	0.540084	1.93	0.51	0.209016	0	1.48	-0.59	-0.662921	0	1		7.97	5.11	0.390673	9	6
0	0	61	0	3	0	1	1	0	0	0	0	0	0	0	0	143	97	4.09	1.01	2.47	1.17	6	4.56	42	1061.7	1.89	0	0	3.27	0.82	0.200489	1.24	-0.23	-0.227723	1.63	0.84	0.340081	1	1.04	0.13	0.111111	1	0
0	1	69	0	1	0	1	0	1	0	1	1	0	0	0	0	141	84	3.04	1.12	1.82	0.67	5.3	7.93	21.7	211.31	0.65	0	0	3.78	-0.74	-0.243421	1.18	-0.06	-0.0535714	1.79	0.03	0.0164835	1	1	-0.33	-0.492537	0	1
0	1	71	0	2	0	1	0	1	0	0	0	1	0	0	0	140	80	3.02	1.32	1.89	1.02	8.7	3.87	16	81.36	0.62	0	1(Liver function injury)	3.1	-0.08	-0.0264901	0.7	0.62	0.469697	1.63	0.26	0.137566	1	1.36	-0.34	-0.333333	0	1		2.59	1.28	0.330749	25.9	-9.9
0	1	65	0	1	0	1	0	1	0	0	0	1	0	0	0	138	90	2.88	0.91	1.84	0.81	9.2	5.34	24	233.25	0.83	1	0	3.57	-0.69	-0.239583	1.14	-0.23	-0.252747	2.15	-0.31	-0.168478	0	1.02	-0.21	-0.259259	0	1
0	1	47	0	2	0	1	0	1	0	0	1	1	1	0	0	142	80	4.43	1.23	3.04	0.89	9.1					0	0	3.97	0.46	0.103837	1.14	0.09	0.0731707	2.17	0.87	0.286184	0	1.03	-0.14	-0.157303	0	1		3.33	-3.33		35
0	1	67	0	3	0	1	1	0	0	0	1	1	1	0	0	158	89	3.75	2.49	2.32	0.89	9.9	7.41	12.5	137	0.74	1	0	3.1	0.65	0.173333	1.41	1.08	0.433735	1.01	1.31	0.564655	1	1.01	-0.12	-0.134831	1	0		8.43	-1.02	-0.137652	20	-7.5
0	1	70	0	2	0	1	1	0	0	0	1	0	0	0	0	166	98	5.06	1.16	3.37	1.09	5.8					0	0	3.51	1.55	0.306324	0.76	0.4	0.344828	1.78	1.59	0.47181	1	0.95	0.14	0.12844	1	0	1
0	1	54	0	4	1	0	0	1	0	0	1	0	0	0	0	166	121	3.35	1.67	1.88	0.85	6	37.37	33.5	1051.97	1	0	0	3.49	-0.14	-0.041791	1.13	0.54	0.323353	1.4	0.48	0.255319	1	1.16	-0.31	-0.364706	0	1		25.72	11.65	0.311747	28	5.5
0	1	68	0	3	0	1	0	1	0	0	1	0	1	0	0	137	88	3.67	0.81	2.84	0.83	5.1	2.09	12.6	90.99		1	0	2.69	0.98	0.26703	0.94	-0.13	-0.160494	1.09	1.75	0.616197	1	0.99	-0.16	-0.192771	0	1	1	3.3	-1.21	-0.578947	26.4	-13.8
0	1	64	0	1	0	1	1	0	0	0	1	0	1	0	0	110	76	3.82	3	2.01	0.81	9.4	21.37	18.5	550.84	1.61	0	0	6.38	-2.56	-0.670157	2.98	0.02	0.00666667	3.38	-1.37	-0.681592	0	1.01	-0.2	-0.246914	1	0		18.76	2.61	0.122134	24	-5.5
1	0	33	0	1	0	1	0	1	0	1	1	0	0	0	0	160	100	3.33	2.03	1.86	0.74	5.5	1	22	113.23	0.5	1	0	2.47	0.86	0.258258	2.19	-0.16	-0.0788177	1.42	0.44	0.236559	1	0.96	-0.22	-0.297297	0	1	1	1.26	-0.26	-0.26	20.3	1.7
1	0	56	0	1	0	1	0	1	0	1	1	1	0	0	0	120	70	5.58	4.85	3.38	1.01	7.4	0.04	28	259.39	0.65	0	0	2.84	2.74	0.491039	1.87	2.98	0.614433	1.62	1.76	0.52071	1	1.07	-0.06	-0.0594059	0	1	1	0.13	-0.09	-2.25	28.7	-0.7
1	0	47	0	1	0	1	0	1	0	0	1	0	0	0	0	140	95	4.42	1.18	2.72	1.24	5.6	4.18	24.5	118.03	0.67	0	0	3.01	1.41	0.319005	1.24	-0.06	-0.0508475	1.23	1.49	0.547794	1	1.17	0.07	0.0564516	0	1		5.09	-0.91	-0.217703	18.9	5.6
1	0	65	0	3	0	1	0	1	1	0	1	1	0	0	0	134	80	5.71	0.84	3.89	1.27	6.4	1.71	23.8	145.96		0	0	2.75	2.96	0.518389	0.93	-0.09	-0.107143	1.05	2.84	0.730077	1	1.08	0.19	0.149606	0	1		2.83	-1.12	-0.654971	18	5.8
1	1	58	0	5	0	1	0	1	1	0	1	0	0	0	0	150	100	4.36	1.53	2.68	0.81	5.6	4.59	14	88.58	0.61	0	1(Liver function injury)	2.86	1.5	0.344037	1.1	0.43	0.281046	1.13	1.55	0.578358	1	1.15	-0.34	-0.419753	0	1	0	6.66	-2.07	-0.45098	19.8	-5.8
1	1	56	0	1	0	1	0	1	1	0	1	0	0	0	0	104	68	4.2	1.13	1.91	1.75	5.8	1.8	11.2	56.6	1.9	0	0	1.68	2.52	0.6	2.07	-0.94	-0.831858	0.3	1.61	0.842932	1	0.77	0.98	0.56	0	1	0	2.02	-0.22	-0.122222	11.2	0
1	1	56	0	1	0	1	1	0	0	1	0	0	0	0	0	120	70	3.83	1.47	2.29	0.76	6.4	1.7	11.2	68.03	0.73	0	0	1.95	1.88	0.490862	0.47	1	0.680272	0.79	1.5	0.655022	1	0.75	0.01	0.0131579	1	0	1	1.32	0.38	0.223529	18.9	-7.7
1	1	64	0	1	0	1	1	0	1	0	1	0	0	0	0	137	90	2.88	0.91	1.83	1.02	5.8	3.32	25.2	156.28	1.18	0	0	2.78	0.1	0.0347222	0.87	0.04	0.043956	1.37	0.46	0.251366	1	1.3	-0.28	-0.27451	1	0	0	3.69	-0.37	-0.111446	23.8	1.4
1	1	65	0	5	0	1	0	1	1	0	1	1	0	0	0	170	104	5.91	3.24	3.96	0.99	6.5	2.66	15.4	104.82	0.67	0	0	2.24	3.67	0.620981	1.56	1.68	0.518519	1.07	2.89	0.729798	1	0.98	0.01	0.010101	0	1		2.02	0.64	0.240602	21	-5.6
1	1	63	0	4	0	1	1	0	1	0	1	0	0	0	0	160	97	2.89	0.8	1.83	0.77	6.1	3.45	16	108.46	0.62	0	0	1.45	1.44	0.49827	0.45	0.35	0.4375	0.34	1.49	0.814208	1	0.87	-0.1	-0.12987	1	0	0	4.22	-0.77	-0.223188	12.6	3.4
1	1	52	0	1	1	0	0	1	1	0	1	1	1	0	0	120	78	6.16	0.79	4.39	1.17	6.9	13.86	26.4	383.14	0.92	0	0	2.21	3.95	0.641234	0.59	0.2	0.253165	0.64	3.75	0.854214	1	1.29	-0.12	-0.102564	0	1	0	5.06	8.8	0.634921	6	20.4
1	1	34	0	2	0	1	1	0	0	0	0	0	0	0	0	156	106	5.3	1.02	3.83	0.98	5.5	3.9	7.7	61.2	0.76	0	0	2.04	3.26	0.615094	1.27	-0.25	-0.245098	0.95	2.88	0.751958	1	1.06	-0.08	-0.0816327	1	0		6.48	-2.58	-0.661538	6	1.7
1	1	57	0	1	0	1	1	0	0	0	1	1	0	0	0	107	73	3.61	2.61	2.3	0.83	7.6	2.54	9.8	41.83	0.71	0	0	2.32	1.29	0.357341	1.46	1.15	0.440613	1.18	1.12	0.486957	1	0.9	-0.07	-0.0843373	1	0		1.75	0.79	0.311024	14	-4.2
1	1	75	0	2	0	1	1	0	0	0	1	1	0	0	0	140	70	5.48	0.6	3.12	1.81	6.5	3.83	11.4	80.11	0.69	0	0	3.12	2.36	0.430657	0.54	0.06	0.1	1.2	1.92	0.615385	1	1.56	0.25	0.138122	1	0
1	1	65	0	4	1	0	0	1	0	0	1	0	1	1	0	134	71	4.03	7.47	2.34	0.72	6.2					0	0	1.49	2.54	0.630273	1.3	6.17	0.825971	0.39	1.95	0.833333	1	0.71	0.01	0.0138889	0	1	0	43.98	-43.98		40
1	1	36	0	9	0	1	0	1	1	0	1	1	0	0	0	130	85	7.05	5.24	4.75	1.06	11.4	3.52	14	102.95	0.68	0	0	3.44	3.61	0.512057	3.08	2.16	0.412214	1.43	3.32	0.698947	1	1.04	0.02	0.0188679	0	1	0	3.79	-0.27	-0.0767045	18	-4
1	1	60	0	3	0	1	0	1	1	0	1	0	1	0	0	178	101	4.29	2.41	2.56	0.62	5.5					0	0	2.54	1.75	0.407925	2.16	0.25	0.103734	1.18	1.38	0.539062	1	0.82	-0.2	-0.322581	0	1	0	5.22	-5.22		28
1	1	60	0	7	1	0	0	1	0	0	1	0	0	0	0	153	96	4.64	0.87	2.32	1.42	5.6	29.39	24	702.28	1.06	0	0	4.31	0.33	0.0711207	1.08	-0.21	-0.241379	1.57	0.75	0.323276	1	1.54	-0.12	-0.084507	0	1	0	4.21	25.18	0.856754	28	-4
1	1	58	0	1	0	1	0	1	0	0	1	1	0	0	0	157	89	2.5	0.75	1.89	0.75	8.2	2.91	16.8	230.31		0	0	2.32	0.18	0.072	1.28	-0.53	-0.706667	0.83	1.06	0.560847	1	0.96	-0.21	-0.28	0	1		2.18	0.73	0.250859	30	-13.2
[truncated: 7 more columns]
